# Supplementary material
Source: Springer Nature journal article supplement (https://www.springermedizin.de/resource/supplementary/13020_2006_3_MOESM1_ESM.pdf/9640790)

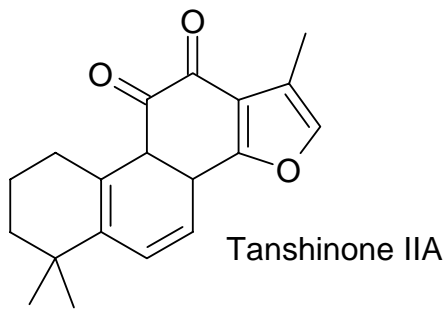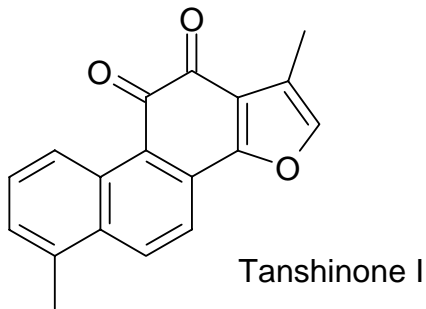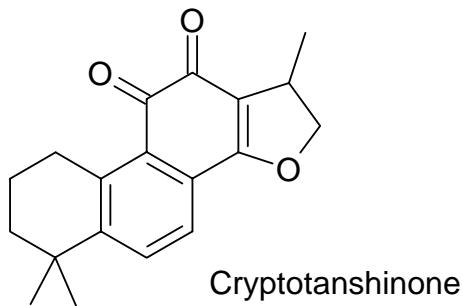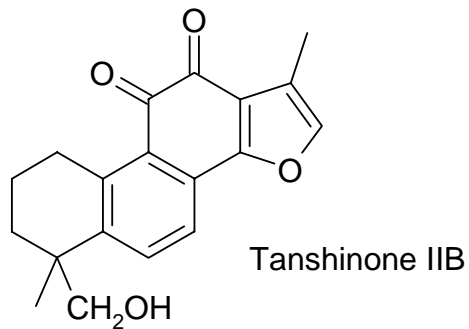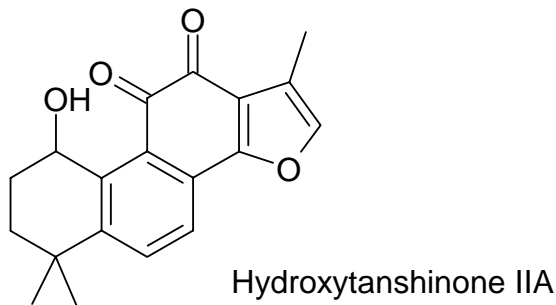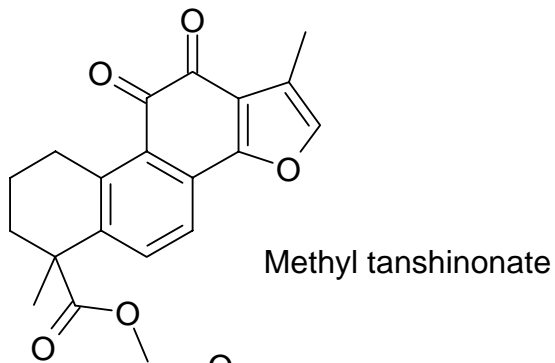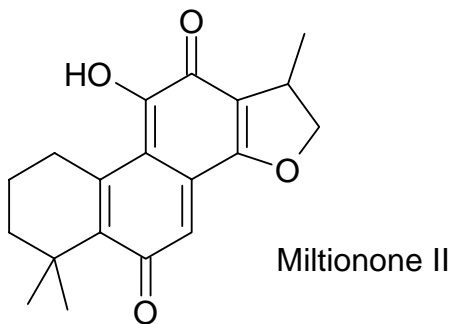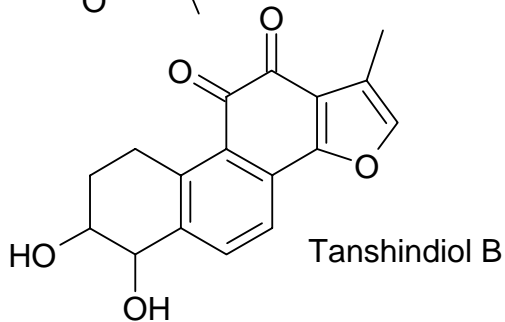

Supplement: MOESM1 [file 9640790]
